# Supplementary material for: Inclusion of 1,4-bis(diphenylhydroxymethyl)benzene with amides: structure and selectivity
Source: Royal Society of Chemistry journal article supplement (doi:10.1039/c1ce05647f), 2011-01-01
Supplement: c1ce05647f.pdf [file c1ce05647f.pdf]

Packing factors with 1.4 Å probe:

|           | void   | molecule | Packing factor % |
|-----------|--------|----------|------------------|
| H•2DMA(a) | 137.56 | 90.33    | 65.6             |
| H•2DMA(b) | 164.19 | 89.90    | 54.7             |
| H•2DMF    | 126.88 | 74.40    | 58.63            |
| H•2NMA    | 161.63 | 73.72    | 45.6             |
| H•NMF     | 80.18  | 57.02    | 71.1             |
