# Supplementary figures and images for: Inclusion of 1,4-bis(diphenylhydroxymethyl)benzene with amides: structure and selectivity
Source: Royal Society of Chemistry journal article supplement (doi:10.1039/c1ce05647f), 2011-01-01

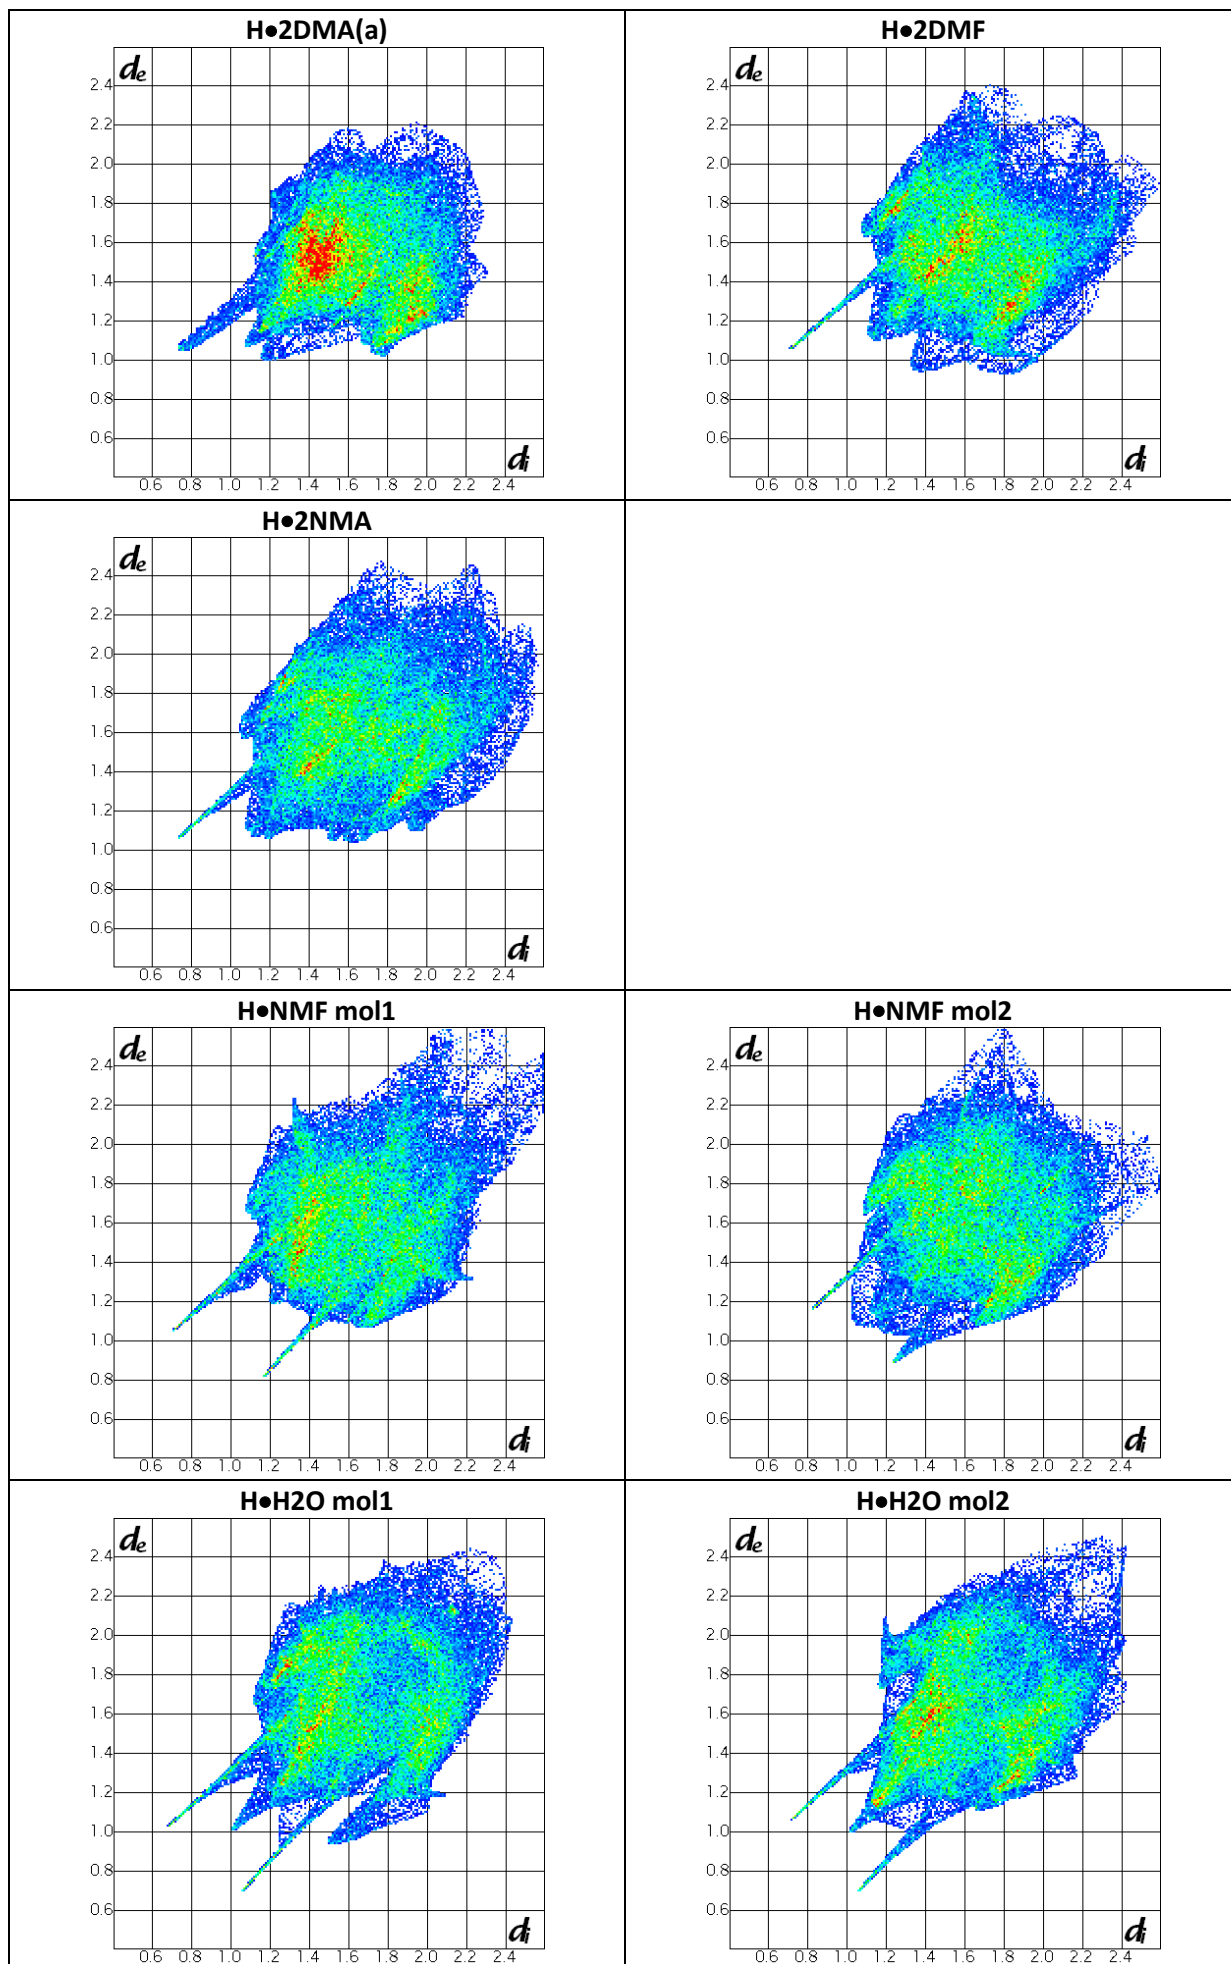

Supplement: c1ce05647f_2.pdf [file c1ce05647f_2.pdf]
